# Supplementary material
Source: PubMed Central journal article supplement (PMC130521)
Supplement: pnas_152456899_4.pdf [file pnas_152456899_4.pdf]

1 AAGGCTCTCGTAACTCTACCGTCATGTCTAAGTCCGAGTCTCCAAGGAGCCAGAACAGC 60  
M S K S E S P K E P E Q L  
61 TCGGGAAGCTCTTTCATCGGAGGGCTGAGCTTCGAAACAACCGACGAGAGTCTGAGGAGCC 120  
R K L F I G G L S F E T T D E S L R S H  
121 ATTTTGTAGCAATGGGGAACACTAACAGACTGTGTGGTAATGAGAGATCCAAACACCAAGA 180  
F E Q W G T L T D C V V M R D P N T K R  
181 GATCCAGGGGCTTTGGGTTTGTACATATGCCACTGTGGAAGAAGTGGATGCTGCCATGA 240  
S R G F G F V T Y A T V E E V D A A M N  
241 ATGCAAGACCACACAAGGTGGATGGAAGAGTTGTGGAACTAAGAGAGCTGTCTCAAGAG 300  
A R P H K V D G R V V E P K R A V S R E  
301 AAGATTCTCAGCGACCAGGTGCCACTTAACTGTGAAAAAGATCTTGTGGTGGTATTA 360  
D S Q R P G A H L T V K K I F V G G I K  
361 AAGAAGACACTGAAGAACATCACCTACGAGATTATTTGAGCAGTATGGGAAGATGAAG 420  
E D T E E H H L R D Y F E Q Y G K I E V  
421 TGATAGAAATTATGACTGACAGAGGCAGTGGGAAAAAGAGGGGCTTTGCTTTTGTACCT 480  
I E I M T D R G S G K K R G F A F V T F  
481 TTGATGACCATGACTCTGTGGATAAGATTGTATTTCAGAAATACCATACTGTAATGGCC 540  
D D H D S V D K I V I Q K Y H T V N G H  
541 ACAACTGTGAAGTAAGAAAGGCTCTGTGCAAGCAAGAGATGGCTAGTGCCTTCATCCAGTC 600  
N C E V R K A L S K Q E M A S A S S S Q  
601 AGAGAGGTCGCGAGTGGTTCTGAAACTTTGGTGGTGGTGGTGGAGCGGTTTGGTGGCA 660  
R G R S G S G N F G G G R G G G F G G N  
661 ATGACAATTTTGGTTCGAGGAGGGAACCTTCAGTGGTGGTGGTGGCTTTGGTGGCAGCCGTG 720  
D N F G R G G N F S G R G G F G G S R G  
721 GTGGTGGTGGATATGGTGGCAGTGGGGATGGCTATAATGGATTGGCAATGATGGAAGCA 780  
G G G Y G G S G D G Y N G F G N D G S N  
781 ATTTTGGAGGTGGTGAAGCTACAATGATTTTGGCAATTACAACACTCAGTCTTCCAATT 840  
F G G G G S Y N D F G N Y N T Q S S N F  
841 TTGGGCCGATGAAGGGAGAAACTTTGGAGGCAGGAGCTCTGGCCCTTATGGTGGTGGAG 900  
G P M K G G N F G G R S S G P Y G G G G  
901 GCCAGTACTTTGCTAAACCACGGAACCAAGGTGGCTATGGCGGTTCCAGCAGCAGCAGTA 960  
Q Y F A K P R N Q G G Y G G S S S S S S  
961 GCTATGGCAGTGGCAGGAGGTTCTAATTACATACAGCCAGGAAACAAGCTTAGCAGGAG 1020  
Y G S G R R F \*  
1021 AGGAGAGCCAGAGAAGTGACAGGGAAGCTACAGGTTACAACAGATTGTGAACTCAGCCA 1080  
1081 AGCACAGTGGTGGCAGGGCCCTAGCTGCTACAAAGAAGACATGTTTTAGACAATACTCATG 1140  
1141 TGTGTGGGCAAAAACCTCAGGACTGTATTTGTGACTAATTGTATAACAGGTTATTTTGT 1200  
1201 TTCTGTCTGTGGAAAGTGTAAAGCATTCCAACAAAAGGTTTACTGTAGACCTTTTCA 1260  
1261 CCCATGCTGTTGATTGCTAAATGTAATAGTCTGATCATGACGCTGAATAAATGTGTC 1317
