# Supplementary material
Source: PubMed Central journal article supplement (PMC130521)

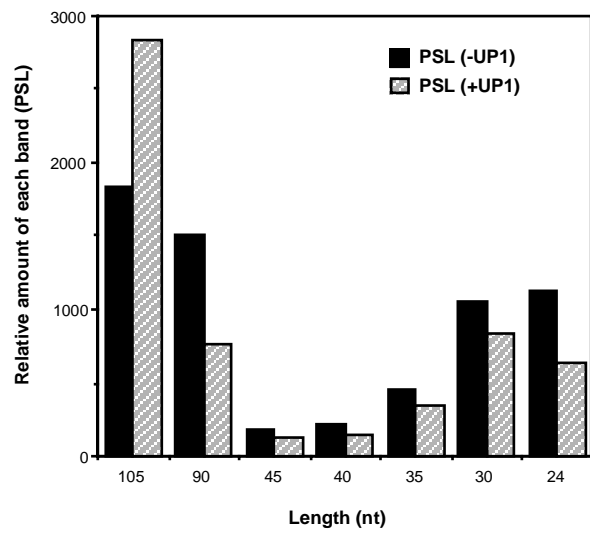

Supplement: pnas_152456899_5.pdf [file pnas_152456899_5.pdf]
